# Supplementary material for: Rational design of the carbon doping of hexagonal boron nitride for oxygen activation and oxidative desulfurization
Source: Royal Society of Chemistry journal article supplement (doi:10.1039/d0cp03893h), 2020-01-01
Supplement: d0cp03893h1.pdf [file d0cp03893h1.pdf]

## Carbon-Doped Hexagonal Boron Nitride: an Effective Catalyst for Oxidative Desulfurization

Hongping Li <sup>a</sup>, Wendi Fu <sup>a</sup>, Jie Yin <sup>a</sup>, Jinrui Zhang <sup>a</sup>, Yujun Li <sup>a</sup>, Ding Jiang <sup>b</sup>,

Naixia Lv <sup>c\*</sup>, Wenshuai, Zhu <sup>a\*</sup>

[<sup>a</sup>] Institute for Energy Research, School of Chemistry and Chemical Engineering,  
Jiangsu University, Zhenjiang, 212013, P. R. China

[<sup>b</sup>] School of Energy and Power Engineering, Jiangsu University, Zhenjiang, 212013,  
P. R. China

[<sup>c</sup>] College of Biology and Chemistry, Xingyi Normal University For Nationalities,  
Xingyi, 562400, P. R. China

**\*Corresponding author:**

E-mail: xiaoxia791102@163.com (N. X. Lv); zhuws@ujs.edu.cn (W. S. Zhu)

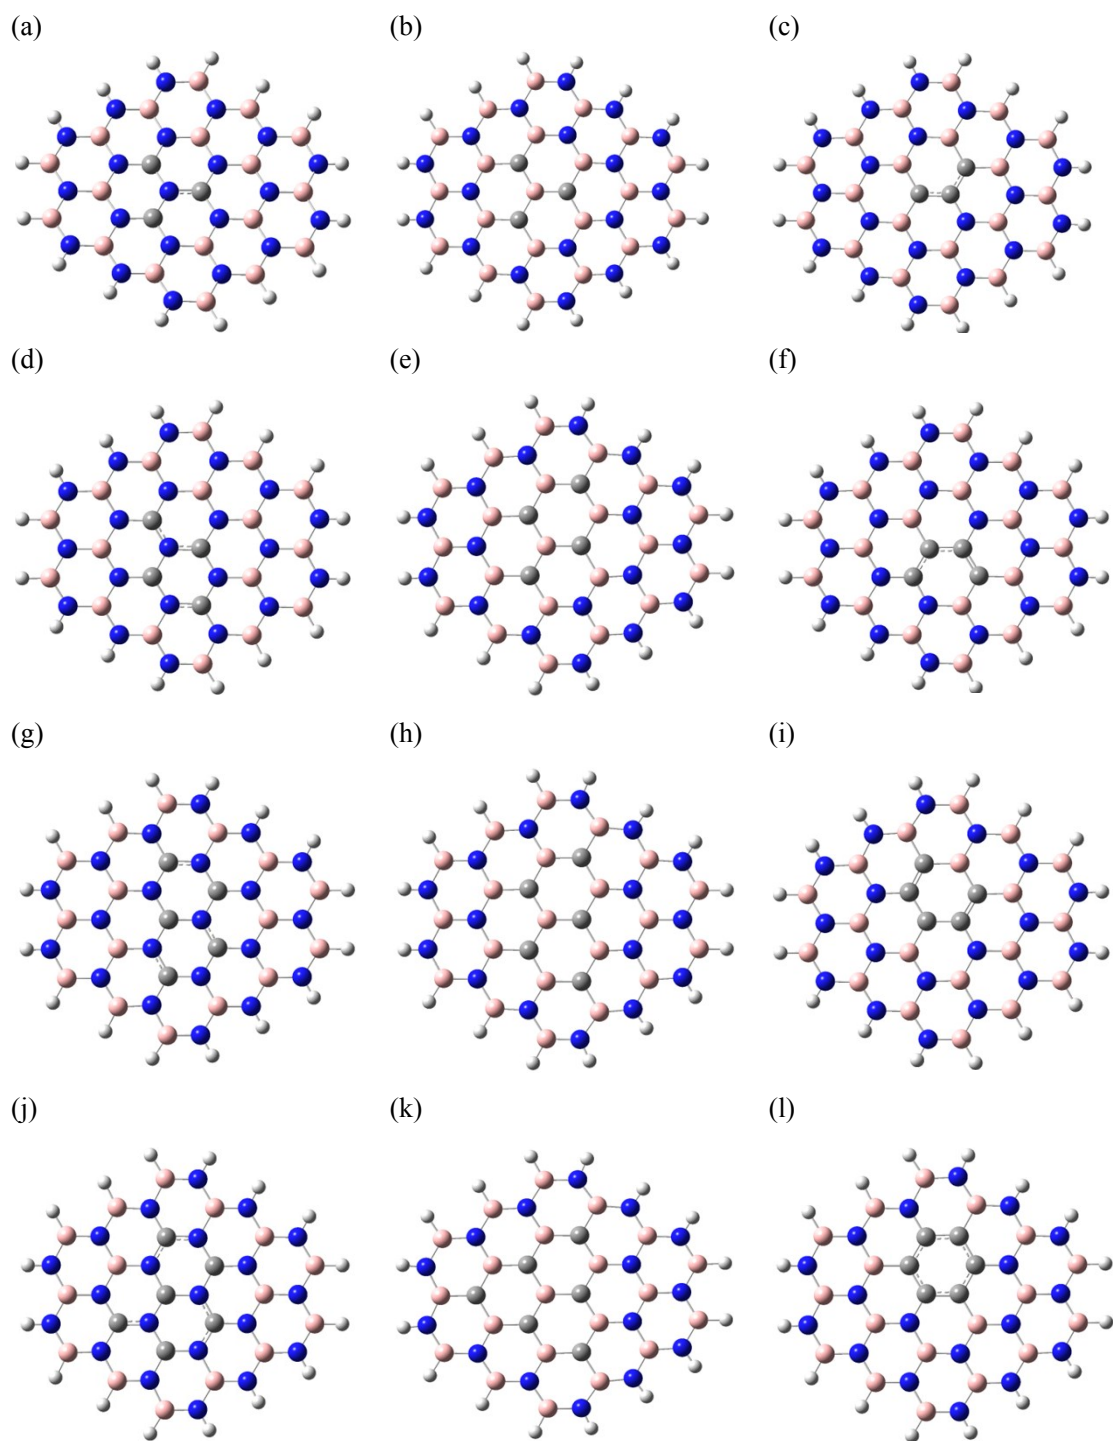

Figure S1. Cluster models for C-doped h-BN sheet (a)  $C_{3B}$ , (b)  $C_{3N}$ , (c)  $C_{B_2N}$ , (d)  $C_{4B}$ , (e)  $C_{4N}$ , (f)  $C_{2B_2N}$ , (g)  $C_{5B}$ , (h)  $C_{5N}$ , (i)  $C_{2B_3N}$ , (j)  $C_{6B}$ , (k)  $C_{6N}$ , (l)  $C_{3B_3N}$ .

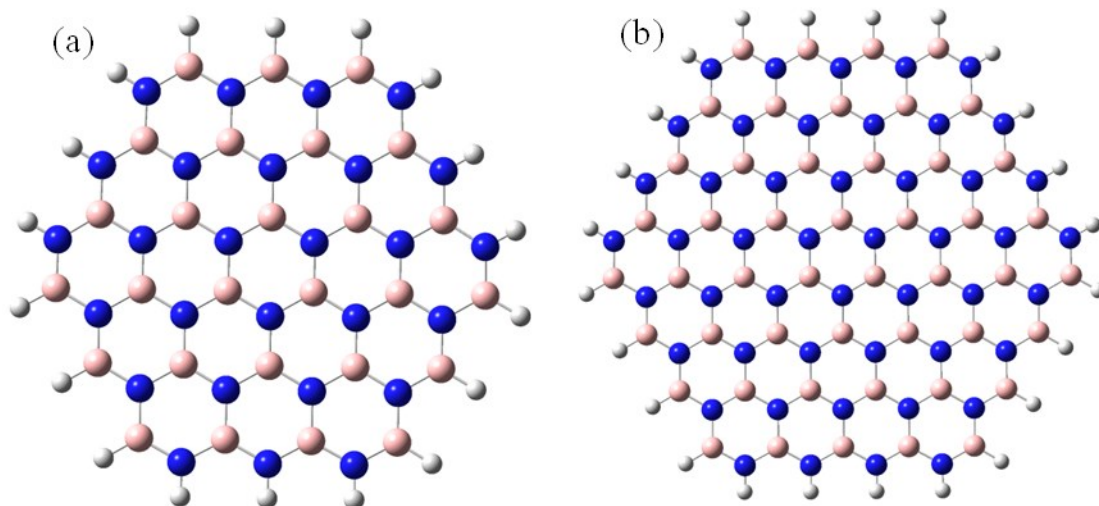

Figure S2. Cluster models for h-BN sheet (a)  $B_{27}N_{27}$ , (b)  $B_{48}N_{48}$

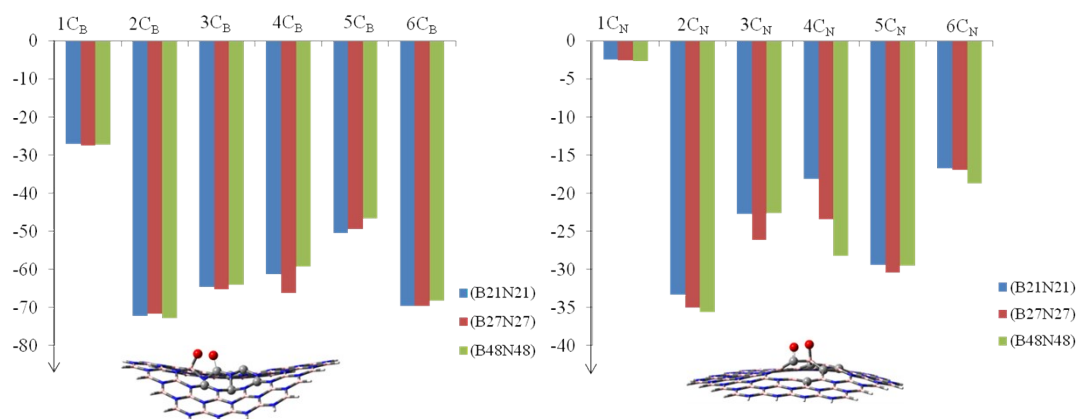

Figure S3. The adsorption energies for  $O_2$  on the different C-doped h-BN models. Left:  $O_2$  on the dispersed  $C_B$  surface. Right:  $O_2$  on the dispersed  $C_N$  surface.

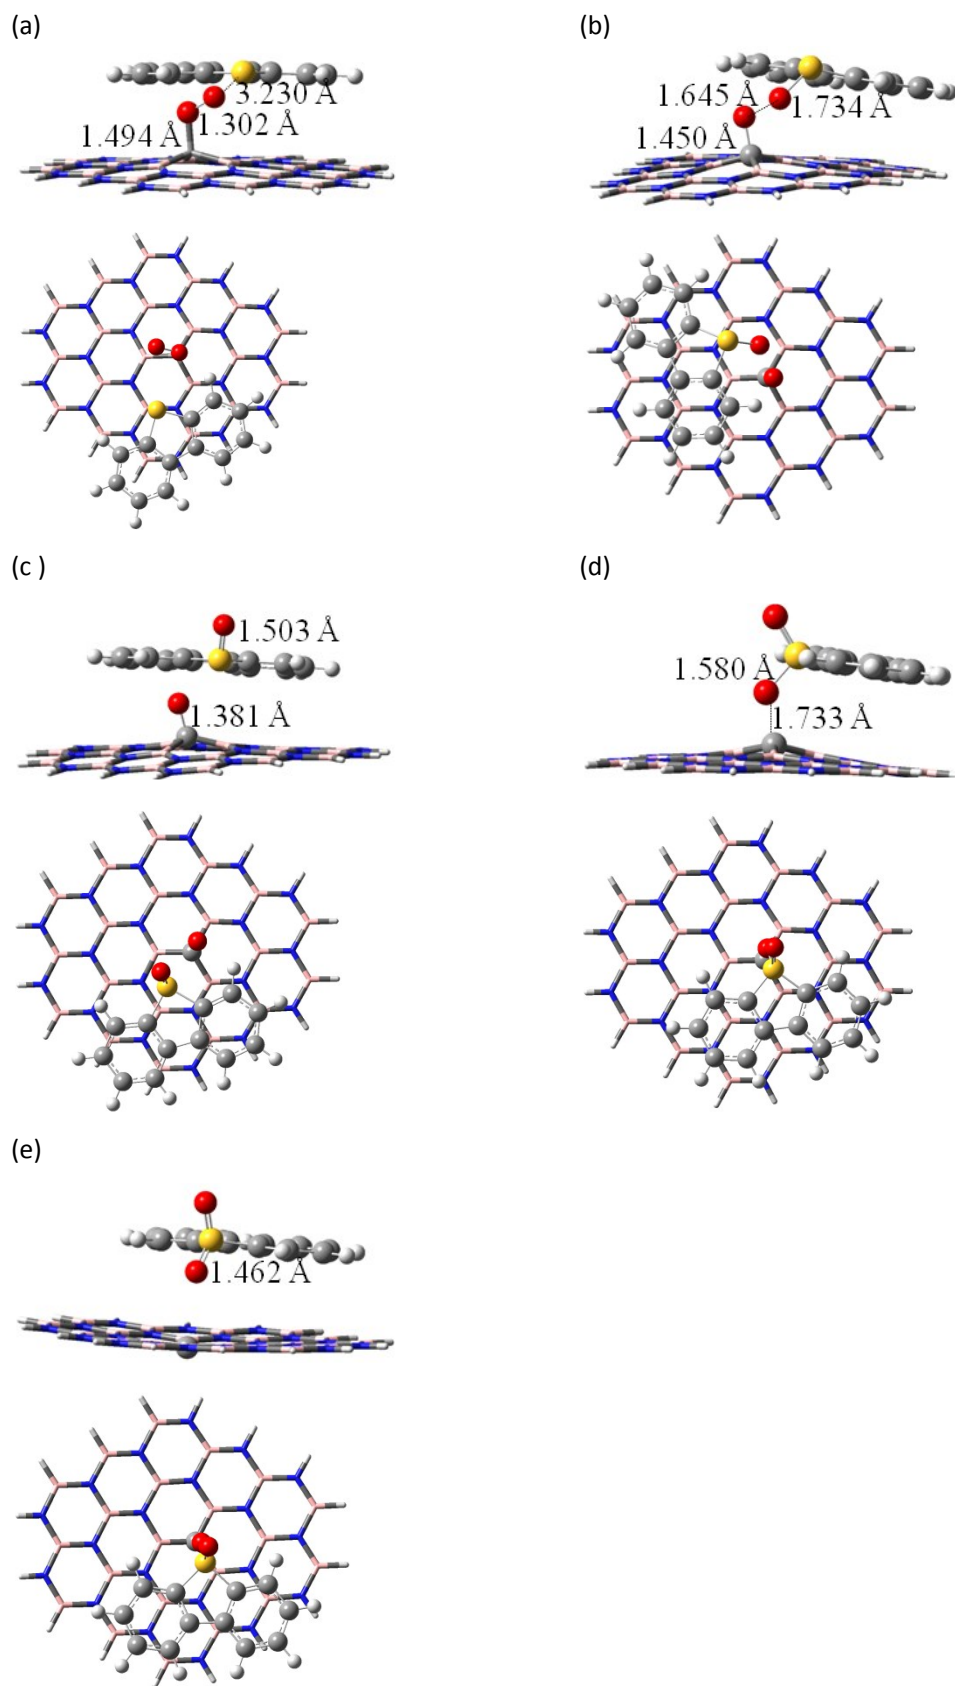

Figure S4 DBT oxidation on  $C_N$  model. (a)  $O_2$  and DBT co-adsorption (b)TS1 (c) IM1, DBTO (d) TS2 (e)FS, DBTOO

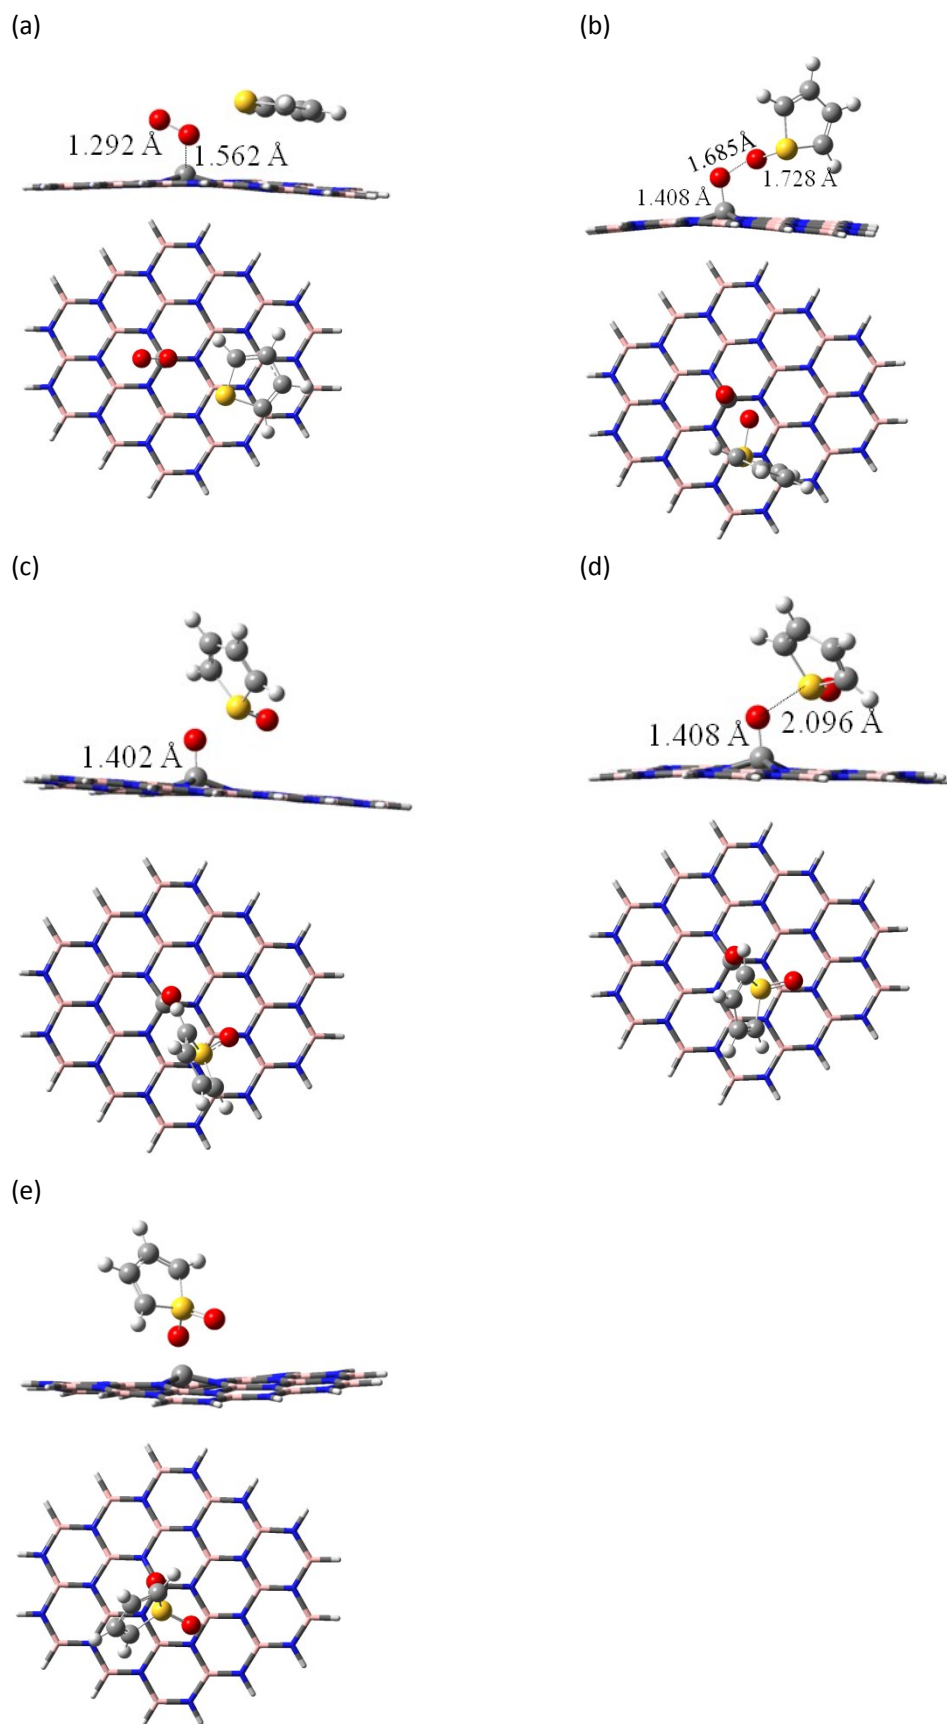

Figure S5 TH oxidation on  $C_B$  model. (a)  $O_2$  and TH co-adsorption (b)TS1 (c) IM1 (d) TS2 (e) FS

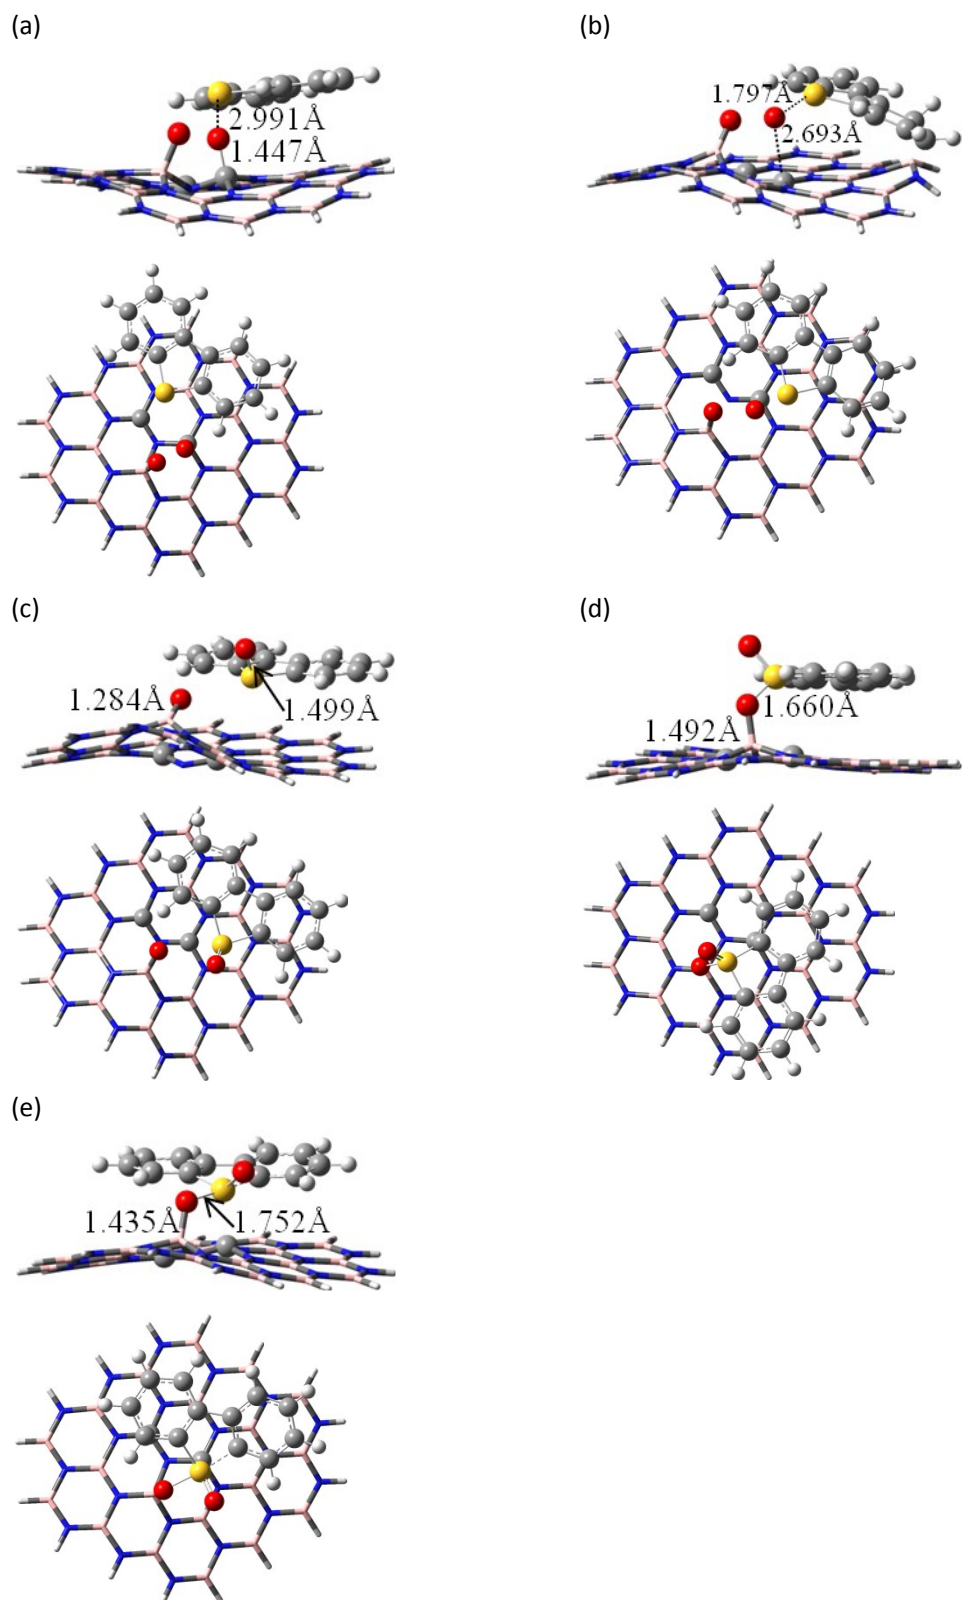

Figure S6 DBT oxidation on  $C_{2B}$  model. (a)  $O_2$  and DBT co-adsorption (b) TS1 (c) IM1 (d) TS2 (e) FS



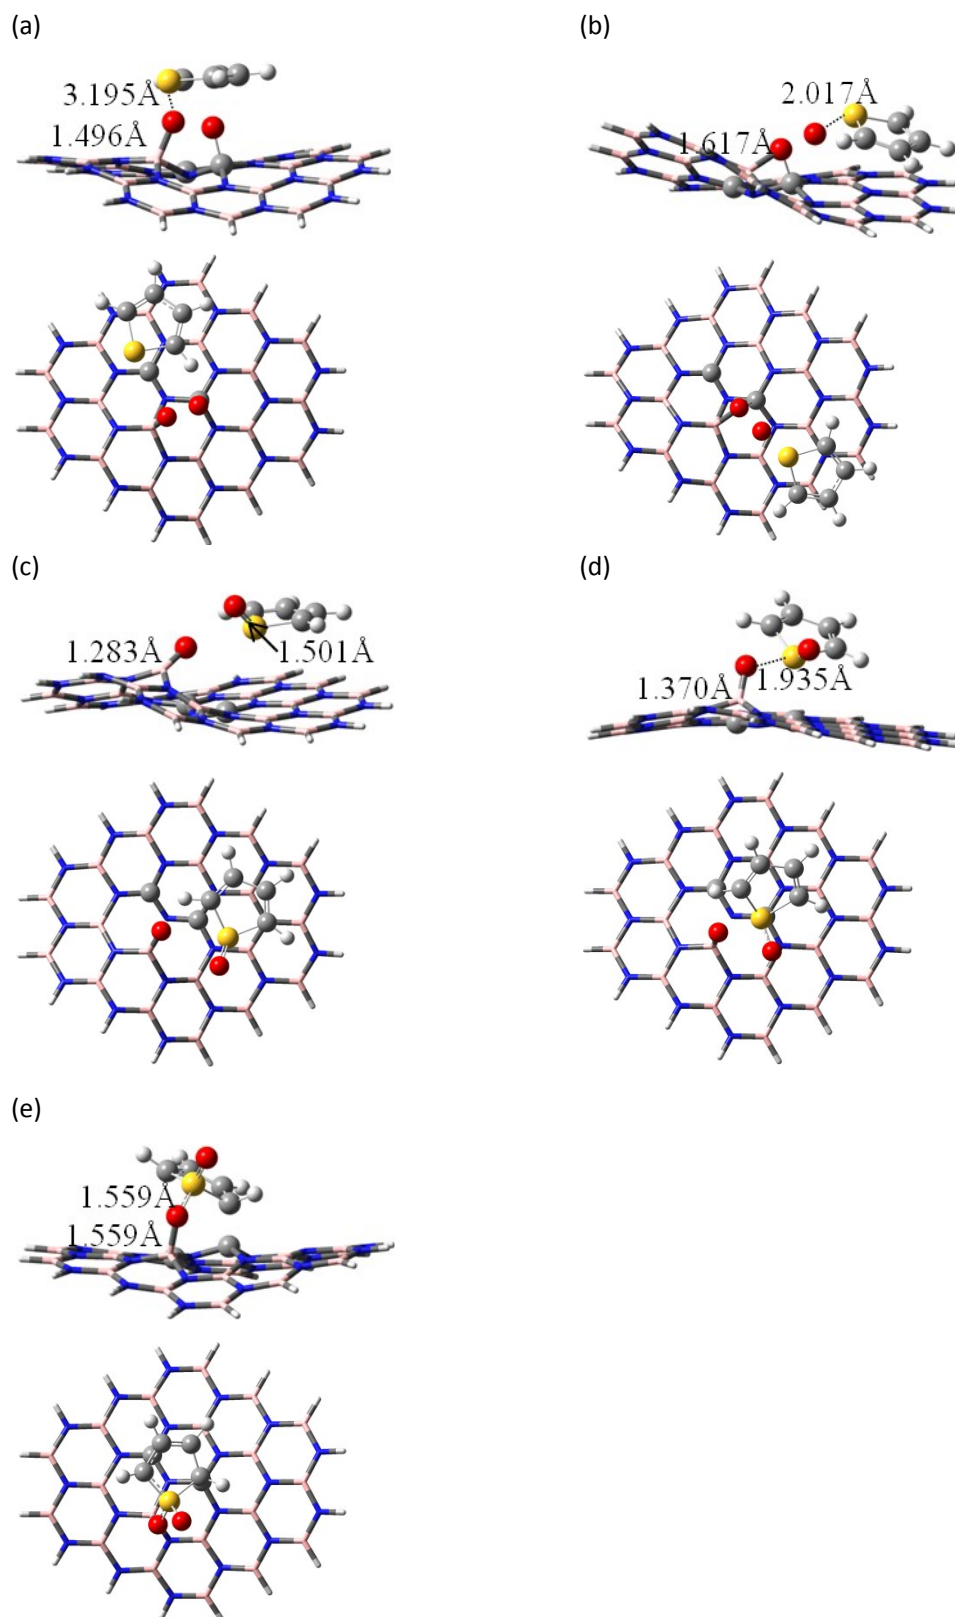

Figure S7 TH oxidation on C<sub>2B</sub> model. (a) O<sub>2</sub> and TH co-adsorption (b)TS1 (c) IM1 (d) TS2 (e) FS

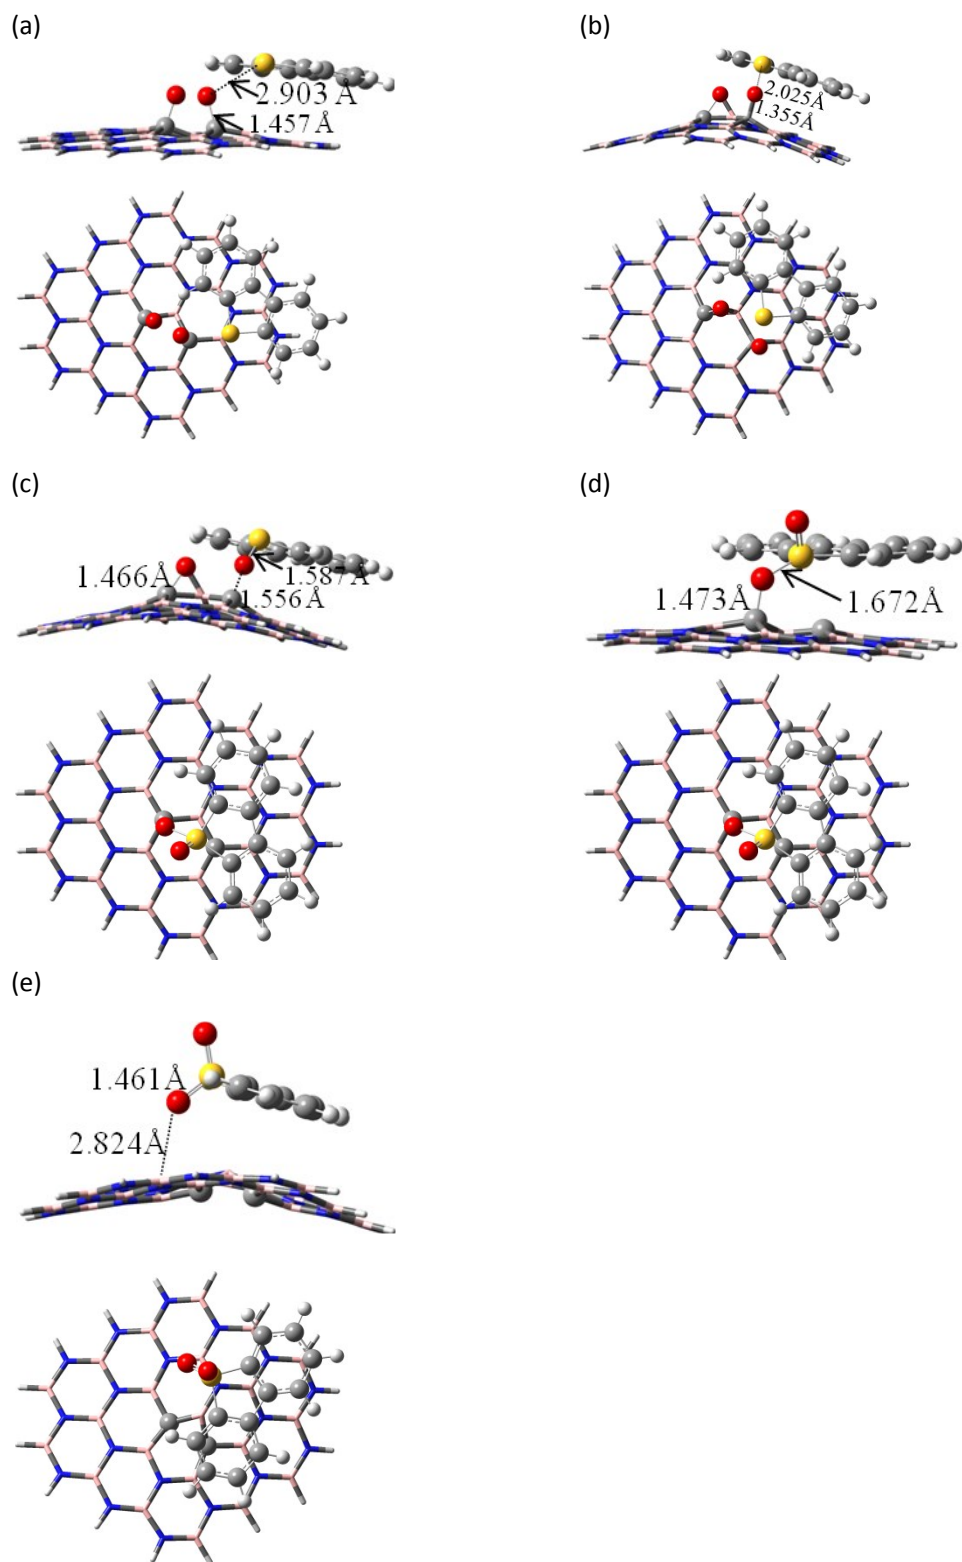

Figure S8 DBT oxidation on  $C_{2N}$  model. (a)  $O_2$  and DBT co-adsorption (b)TS1 (c) IM1 (d) TS2 (e) FS



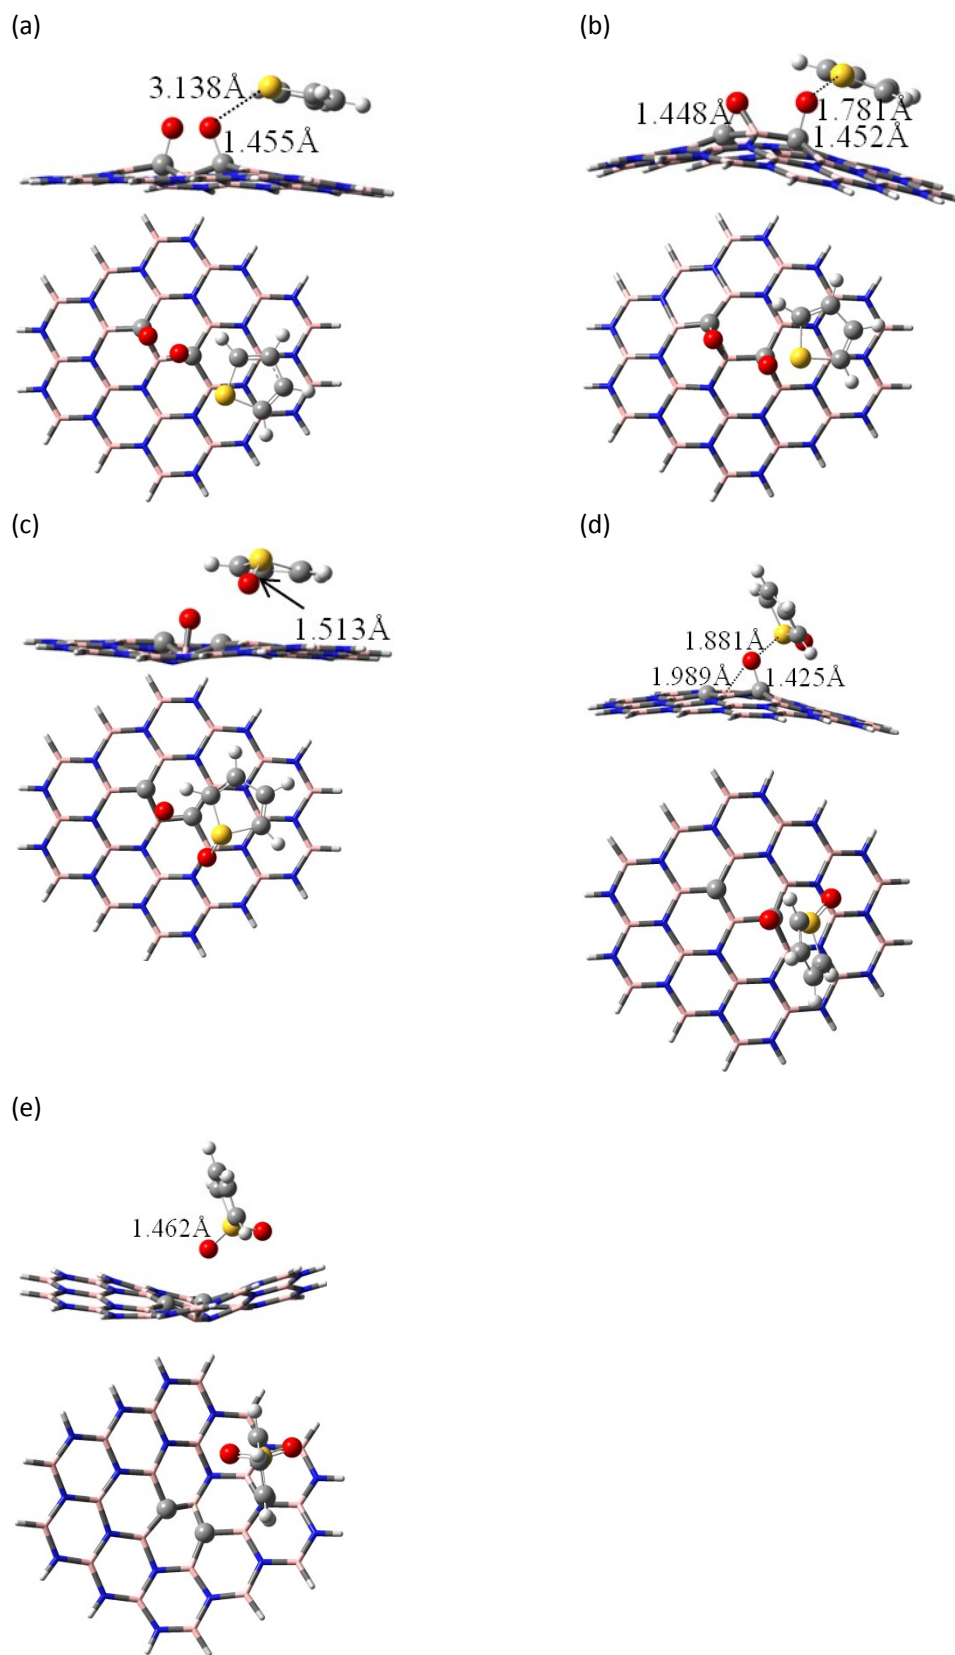

Figure S9 TH oxidation on  $C_{2N}$  model. (a)  $O_2$  and TH co-adsorption (b)TS1 (c) IM1 (d) TS2 (e) FS

Table S1 The adsorption Gibbs free energies ( $G_{ad}$ , kcal/mol) of thiophene (TH) on  $C_N$  monolayer.

|     | sulfcompound | sulfcompound<br>+O <sub>2</sub> | TS1  | IM1  | TS2  | FS    |
|-----|--------------|---------------------------------|------|------|------|-------|
| TH  | 3.5          | 5.2                             | 57.3 | 14.9 | 30.5 | 23.8  |
| DBT | -2.6         | 1.5                             | 45.6 | 4.2  | 29.3 | -11.7 |

Table S2 The adsorption Gibbs free energies ( $G_{ad}$ , kcal/mol) of TH and DBT on  $C_B$  monolayer.

|     | Sulfite | sulfite+O <sub>2</sub> | TS1  | IM1  | TS2  | FS    |
|-----|---------|------------------------|------|------|------|-------|
| TH  | 3.9     | -13.6                  | 43.7 | 8.5  | 15.5 | 6.3   |
| DBT | -0.4    | -26.2                  | 30.0 | -6.1 | 4.0  | -13.1 |
